# Supplementary material for: Interface engineering towards overall water electrolysis over NiCo2O4/NiMo hybrid catalysts
Source: Royal Society of Chemistry journal article supplement (doi:10.1039/d3cy01719b), 2024-01-01
Supplement: d3cy01719b1.pdf [file d3cy01719b1.pdf]

## Supplementary material

### Interface engineering towards overall water electrolysis upon NiCo<sub>2</sub>O<sub>4</sub>/NiMo hybrid catalysts

Shan Gao,<sup>a</sup> Lijing Wang,<sup>b</sup> Xuxin Kang,<sup>a</sup> Linxia Wang,<sup>c</sup> Xiangmei Duan,<sup>a</sup> and Weichao Wang<sup>b,\*</sup>

<sup>a</sup> *School of Physical Science and Technology, Ningbo University, Ningbo, 315211, China*

<sup>b</sup> *College of Electronics Information and Optical Engineering, Nankai University, Tianjin, 300071, China*

<sup>c</sup> *Key Laboratory of Brain-like Neuromorphic Devices and Systems of Hebei Province, College of Electron and Information Engineering, Hebei University, Baoding, 071002, China*

\* *Corresponding Author*

E-mail: [weichaowang@nankai.edu.cn](mailto:weichaowang@nankai.edu.cn)

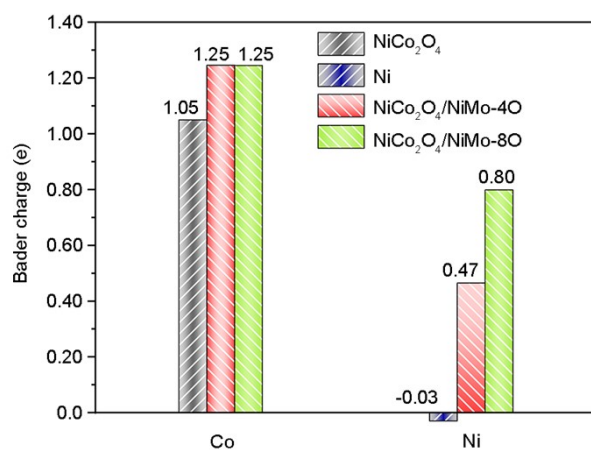

Fig. S1 The Bader charge of Co and Ni sites at the NiCo<sub>2</sub>O<sub>4</sub>/NiMo-xO (x=4, 8) interface.

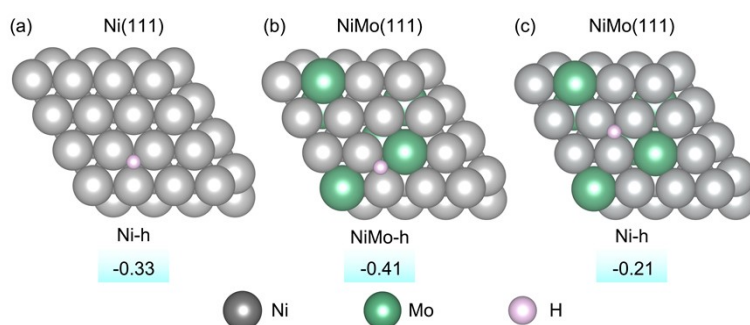

Fig. S2 The configurations for H adsorbed on Ni(111) and NiMo(111) with the adsorption site of Ni-h and NiMo-h. The corresponding Gibbs free energies of hydrogen adsorption ( $\Delta G^*_{H}$ ) are labeled below the picture, in the unit of eV.

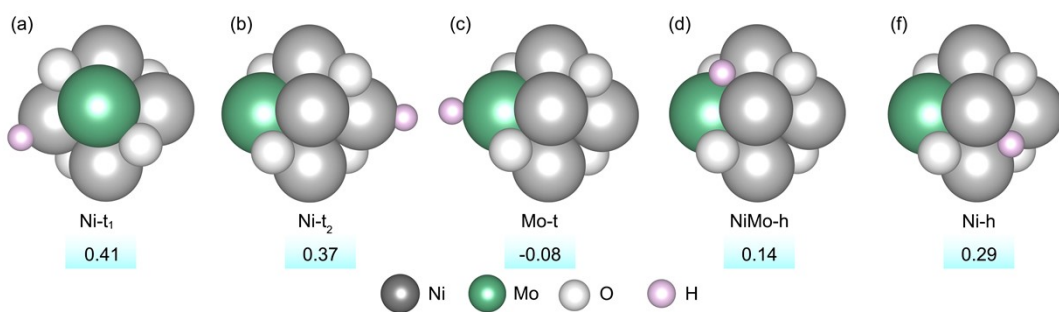

Fig. S3 The configurations for H adsorbed on Ni<sub>5</sub>Mo-4O cluster with adsorption sites of Ni-t, Mo-t, NiMo-h, and Ni-h. The subscript 1 in Ni-t<sub>1</sub> means this Ni atom is closer to the Mo atom than that of Ni-t<sub>2</sub>. The corresponding  $\Delta G^*_{H}$  is labeled below the picture in the unit of eV.

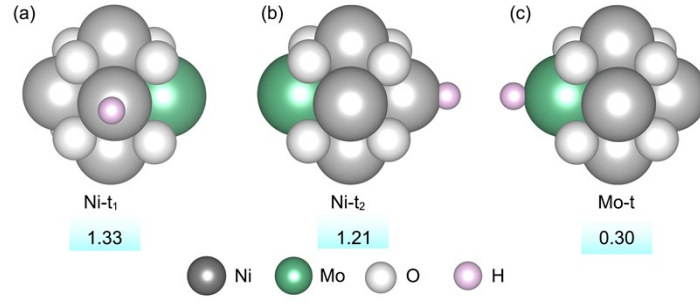

Fig. S4 The configurations for H adsorbed on Ni<sub>5</sub>Mo-8O cluster with adsorption sites of Ni-t and Mo-t. The subscript 1 in Ni-t<sub>1</sub> means this Ni atom is closer to the Mo atom than that of Ni-t<sub>2</sub>.

The corresponding  $\Delta G_{*H}$  is labeled below the picture in the unit of eV.

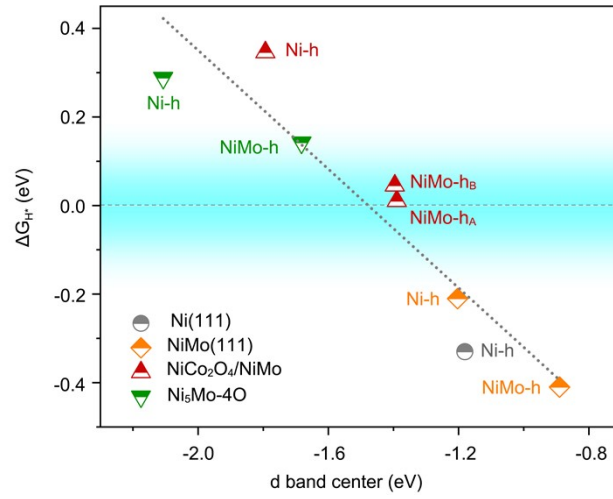

Fig. S5 Correlation between Gibbs free energies of hydrogen adsorption ( $\Delta G_{*H}$ ) and  $d$  band center ( $\epsilon_d$ ) of the adsorption sites.

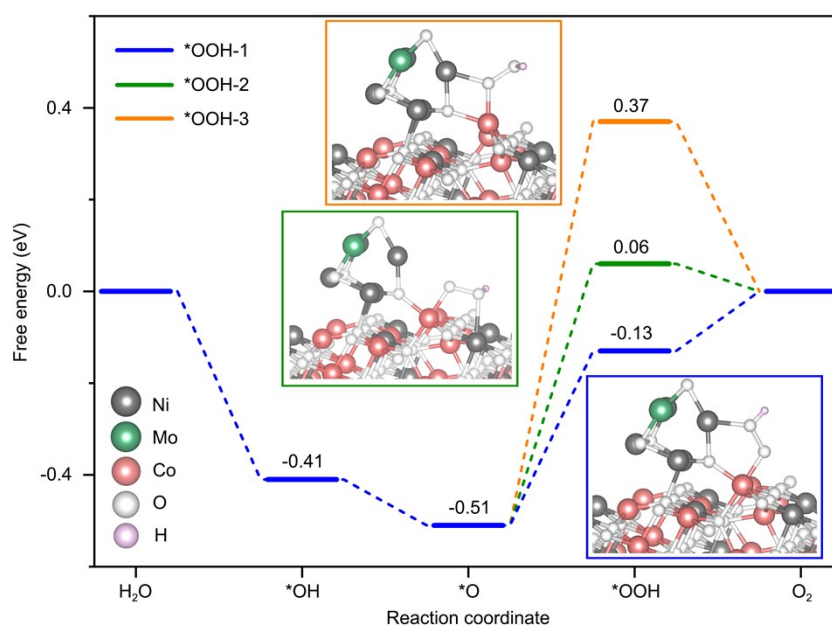

Fig. S6 Free energy diagram of OER process on  $\text{NiCo}_2\text{O}_4/\text{NiMo}$  hybrid catalyst with three different adsorption configurations for  $^*\text{OOH}$ .

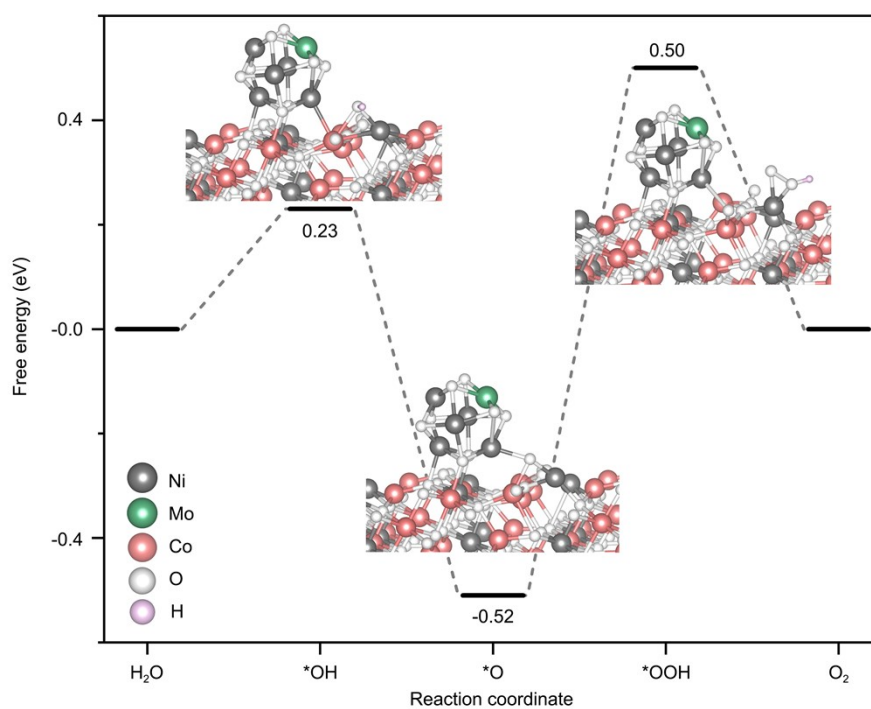

Fig. S7 Free energy diagram of OER process on  $\text{NiCo}_2\text{O}_4/\text{Ni}_5\text{Mo-8O}$ . The active center Co of  $\text{NiCo}_2\text{O}_4$  forms a Co-Ni bond with the Ni of  $\text{NiMo}$  cluster at the interface. The OER overpotential is 1.02 V.

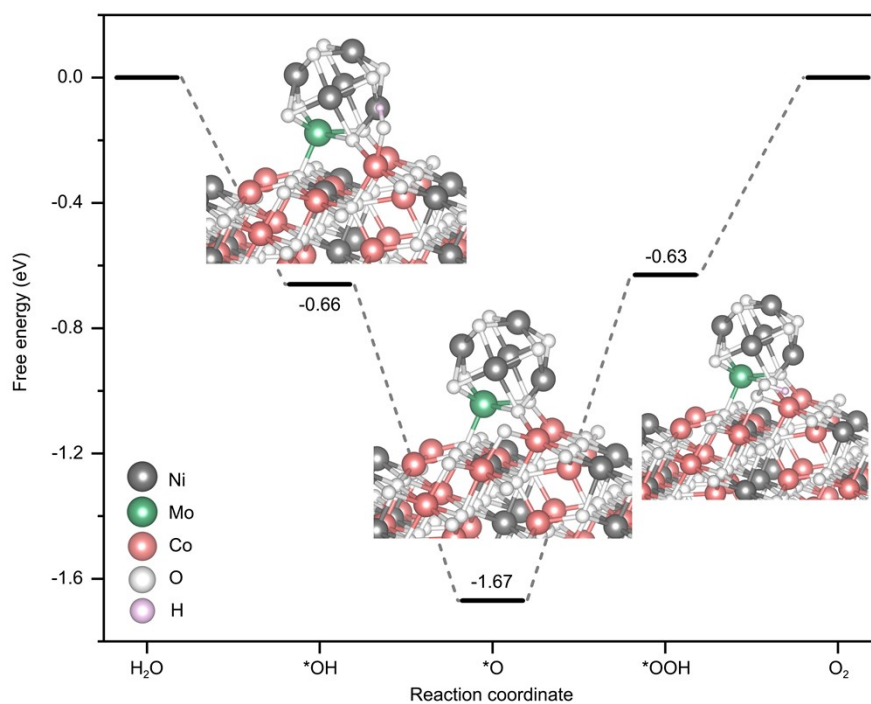

Fig. S8 Free energy diagram of OER process on  $\text{NiCo}_2\text{O}_4/\text{Ni}_5\text{Mo-8O}$ . The active center Co of  $\text{NiCo}_2\text{O}_4$  forms a Co-O bond with the O of  $\text{Ni}_5\text{Mo-8O}$  cluster at the interface. The OER overpotential is 1.04 V.

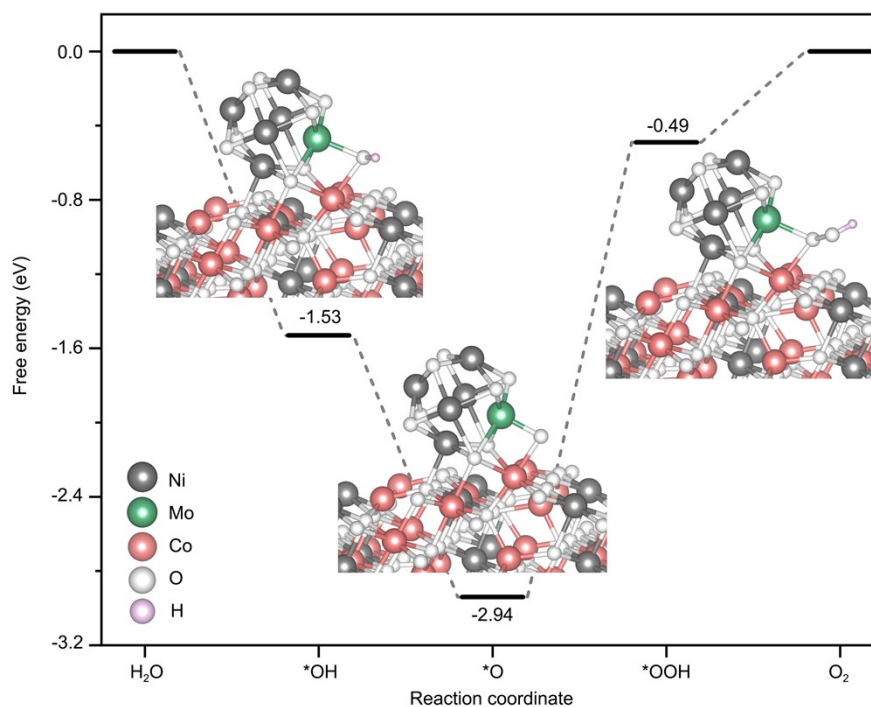

Fig. S9 Free energy diagram of OER process on  $\text{NiCo}_2\text{O}_4/\text{Ni}_5\text{Mo-8O}$ . The active center Co of  $\text{NiCo}_2\text{O}_4$  forms two Co-O bonds with the O of  $\text{Ni}_5\text{Mo-8O}$  cluster at the interface. The Mo atom of  $\text{Ni}_5\text{Mo-8O}$  at the interface strongly adsorbs intermediates  $^*\text{O}$  and  $^*\text{OH}$ . The OER overpotential increases to 2.45 V.
